# Supplementary material for: Comparative RNA-Seq analysis reveals genes associated with masculinization in female Cannabis sativa
Source: Planta. 2021 Jan 4;253(1):17. doi: 10.1007/s00425-020-03522-y (PMC7779414; doi:10.1007/s00425-020-03522-y)
Supplement: Supplementary file 2 — Supplementary file2 Table S1. List of primers used for qPCR study. Table S2. Male-specific differentially expressed transcripts that contain BLAST hits against UniProtKB. A transcript is considered to be MF-specific, when it has a mean RPKM value of ≥ 5 in MF, but zero mean RPKM in both genetically female background FF and IMF samples. Table S3. Differentially expressed cannabis transcripts homologous to genes associated with floral development, including anther/pollen development & flower organ identity. A total of 245 sex determination and floral development associated DEGs were identified. Of these, 61 in the IMFvsFF and MFvsFF comparisons potentially control anther/ pollen development, floral transition and floral organ identity. A transcript is considered to be differentially expressed in a library, when it has a mean RPKM value of ≥ 5 at least in one of the two samples (e.g., IMF or FF in IMFvsFF library), with a log2 fold change value ≥│1│and FDR p-value ≤ 0.05. Table S4. Differentially expressed genes that are associated with phytohormone metabolism and signalling. These transcript homologs, which are potentially involved in flower sex determination and floral development, correspond to abscisic acid (13), auxin (13), cytokinin (6), ethylene (12), and gibberellin (6) signalling pathways. A transcript is considered to be differentially expressed in a library, when it has a mean RPKM value of ≥ 5 at least in one of the two samples (e.g., IMF or FF in IMFvsFF library), with a log2 fold change value ≥│1│and FDR p-value ≤ 0.05. Table S5. Differentially expressed genes related to sugar/lipid metabolisms, cell wall and membrane formations, and other male-specific genes. A transcript is considered to be differentially expressed in a library, when it has a mean RPKM value of ≥ 5 at least in one of the two samples (e.g., IMF or FF in IMFvsFF library), with a log2 fold change value ≥│1│and FDR p-value ≤ 0.05. (XLSX 69 KB) [file 425_2020_3522_MOESM2_ESM.xlsx]

## Sheet: Table S1
Table S1. List of primers used for qPCR study.
Gene ID	Forward (5' ==>3')	Reverse (5' ==>3')
CsMen8	AGTGTTTGTGATGGCAGTAG	CGCGCACACATTTAGGT
CsLEC	GAAGGAGTGACTTCGTTGG	TGGACTTGATATTCCCATCTTC
CsC70A2	CTGGCCTCATTGTGTGATAA	TCGTCTTGCCTGAGAAGTA
CsAP3	GGTGTTGATCTGTGGAAGTC	TCTCTGTCTGATCTGTGTCC
CsbHLH91	GGCTAACAAGAGGCGTAAA	CAGCCAAGAGCTCCTTATG
CsAFC2	CGACCTGCTGAGAAGTATG	AGGTTCTGAAGACGATGAAG
CsMADS2	GGAATATCACAAACACTCCAAAG	CAGCTCTATCACCATGTTCTC
CsAMS	GTTGTGCTGGGACTGAAA	GGGTGTTGACATATGGTATCC
CsSHT	GGGCCTTTCTATGGGAATC	CCCAGGGCCAACATAAAT
CsMYB80	CTGGAACACTAAGCTGAGAAA	CCACCCACATTTCCATAGTC
CsMYB35	CCTCTGCCTCCTTGTAATTC	AACCCTCCAAATCATTCTCC
CsDYT1	GGAGAAGCTCAACGACAAG	TTGCAGCTCGCTAATATACG
CsWUS	TCCACGCTGAGGACATTA	AAACCACCCGGAGTAGTAG
CsCR26L	CGTGGATGACGATGAAGATG	CAGCCAAAGACTCTCTCAAC
CsAGL11	CTGTTCTCTGTGATGCTGAG	TGCCTTCTTGTACCTTTCTATG
CsACT	CTTGCTGGTCGTGATCTTAC	TCATGTCCCTCACAATTTCC
CsEF2	AGGTCCTCTTGATGATGTTTAC	ACCTACCCTTATCAGATGCT

## Sheet: Table S2
Table S2. Male-specific differentially expressed transcripts that contain BLAST hits against UniProtKB. A transcript is considered to be MF-specific, when it has a mean RPKM value of ≥ 5 in MF, but zero mean RPKM in both genetically female background FF and IMF samples.
Seq ID	IMFvFF log2FC	IMFvFF FDR	MFvFF log2FC	MFvFF FDR	MFvIMF log2FC	MFvIMF FDR	Mean RPKM FF (n=3)	Mean RPKM IMF (n=4)	Mean RPKM MF (n=2)	Annotation description
PPSMF1-1_S1_R1_001_(paired)_contig_40935	0.0145089	0.999936	13.9233	9.7891e-06	13.9088	9.11281e-07	0	0	64.3077	PXG5_ARATH Probable peroxygenase 5 OS=Arabidopsis thaliana OX=3702 GN=PXG5 PE=2 SV=1
PPSMF1-1_S1_R1_001_(paired)_contig_16421	0.0153128	0.999936	13.7072	2.17703e-06	13.6918	1.01576e-07	0	0	51.6373	ACPM1_ARATH Acyl carrier mitochondrial OS=Arabidopsis thaliana OX=3702 GN=MTACP1 PE=1 SV=1
PPSMF1-1_S1_R1_001_(paired)_contig_45477	0.015311	0.999936	12.6898	2.45551e-05	12.6745	2.3545e-06	0	0	46.3041	ACT3_PEA Actin-3 OS=Pisum sativum OX=3888 PE=2 SV=1
PPSMF1-1_S1_R1_001_(paired)_contig_27794	0.0153098	0.999936	11.0518	0.000409382	11.0365	8.6299e-05	0	0	24.7206	KCY3_ORYSJ UMP-CMP kinase 3 OS=Oryza sativa japonica OX=39947 GN=URA6 PE=2 SV=1
PPSMF1-1_S1_R1_001_(paired)_contig_20720	0.0153417	0.999936	12.2756	5.57607e-05	12.2602	6.72551e-06	0	0	23.296	TRXM_SPIOL Thioredoxin M- chloroplastic OS=Spinacia oleracea OX=3562 PE=1 SV=2
PPSMF1-1_S1_R1_001_(paired)_contig_24135	0.0153174	0.999936	13.2051	6.75148e-06	13.1898	4.37108e-07	0	0	22.9989	SDF2_ARATH Stromal cell-derived factor 2 OS=Arabidopsis thaliana OX=3702 GN=SDF2 PE=1 SV=1
PPSMF1-1_S1_R1_001_(paired)_contig_9155	0.0153498	0.999936	11.6978	0.000148618	11.6825	2.34046e-05	0	0	19.5228	T2AG_ARATH Transcription initiation factor IIA subunit 2 OS=Arabidopsis thaliana OX=3702 GN=TFIIA-S PE=3 SV=2
PPSMF1-1_S1_R1_001_(paired)_contig_45639	0.014766	0.999936	10.7998	0.00115965	10.7851	0.000356574	0	0	19.4141	MSSP2_ARATH Monosaccharide-sensing 2 OS=Arabidopsis thaliana OX=3702 GN=MSSP2 PE=1 SV=2
PPSMF1-1_S1_R1_001_(paired)_contig_3374	0.0153488	0.999936	11.3339	0.000292218	11.3186	5.62157e-05	0	0	18.7116	E1314_ARATH Glucan endo-1,3-beta-glucosidase 14 OS=Arabidopsis thaliana OX=3702 GN=At2g27500 PE=1 SV=2
PPSMF1-1_S1_R1_001_(paired)_contig_23776	0.0153446	0.999936	11.2965	0.000312261	11.2811	6.10872e-05	0	0	18.6867	SIP_ARATH Signal peptide peptidase OS=Arabidopsis thaliana OX=3702 GN=SPP PE=2 SV=1
PPSMF1-1_S1_R1_001_(paired)_contig_31602	0.0152958	0.999936	12.6095	3.0036e-05	12.5942	3.05674e-06	0	0	18.6614	PLY59_SOLLC Probable pectate lyase P59 OS=Solanum lycopersicum OX=4081 GN=LAT59 PE=2 SV=1
PPSMF1-1_S1_R1_001_(paired)_contig_43665	0.0146438	0.999936	10.918	0.00121547	10.9033	0.000387424	0	0	16.8315	GSTF2_TOBAC Glutathione S-transferase APIC OS=Nicotiana tabacum OX=4097 GN=APIC PE=2 SV=1
PPSMF1-1_S1_R1_001_(paired)_contig_20674	0.0153498	0.999936	10.8569	0.000519626	10.8416	0.000115233	0	0	15.109	T2AG_ARATH Transcription initiation factor IIA subunit 2 OS=Arabidopsis thaliana OX=3702 GN=TFIIA-S PE=3 SV=2
PPSMF1-1_S1_R1_001_(paired)_contig_15714	0.015349	0.999936	12.881	1.46988e-05	12.8656	1.19494e-06	0	0	14.8575	NAGK_ARATH Acetylglutamate chloroplastic OS=Arabidopsis thaliana OX=3702 GN=NAGK PE=1 SV=1
PPSMF1-1_S1_R1_001_(paired)_contig_17768	0.0153373	0.999936	12.2171	6.48408e-05	12.2017	8.16003e-06	0	0	13.8785	CSN5B_ARATH COP9 signalosome complex subunit 5b OS=Arabidopsis thaliana OX=3702 GN=CSN5B PE=1 SV=1
PPSMF1-1_S1_R1_001_(paired)_contig_13987	0.192706	0.999936	11.7473	0	11.5546	0	0.00427271	0.00482329	12.6489	PKL_ARATH CHD3-type chromatin-remodeling factor PICKLE OS=Arabidopsis thaliana OX=3702 GN=PKL PE=1 SV=1
PPSMF1-1_S1_R1_001_(paired)_contig_28040	0.0153255	0.999936	12.9294	1.37254e-05	12.9141	1.09995e-06	0	0	10.5551	CHERP_MOUSE Calcium homeostasis endoplasmic reticulum OS=Mus musculus OX=10090 GN=Cherp PE=1 SV=1
PPSMF1-1_S1_R1_001_(paired)_contig_17875	0.0146166	0.999936	11.5191	0.000547915	11.5045	0.000143308	0	0	10.482	GSTF_HYOMU Glutathione S-transferase OS=Hyoscyamus muticus OX=35626 PE=1 SV=1
PPSMF1-1_S1_R1_001_(paired)_contig_19167	0.0152796	0.999936	10.4742	0.000936725	10.4589	0.000246612	0	0	9.88712	C71D8_SOYBN Cytochrome P450 71D8 OS=Glycine max OX=3847 GN=CYP71D8 PE=2 SV=1
PPSMF1-1_S1_R1_001_(paired)_contig_27156	0.0146665	0.999936	10.1741	0.00301541	10.1594	0.00120634	0	0	9.84183	SERA2_ARATH D-3-phosphoglycerate dehydrogenase chloroplastic OS=Arabidopsis thaliana OX=3702 GN=PGDH2 PE=1 SV=2
PPSMF1-1_S1_R1_001_(paired)_contig_20637	0.0153498	0.999936	11.7133	0.000143129	11.698	2.22117e-05	0	0	9.69118	PRP43_ARATH Probable pre-mRNA-splicing factor ATP-dependent RNA helicase DEAH3 OS=Arabidopsis thaliana OX=3702 GN=At2g47250 PE=2 SV=1
PPSMF1-1_S1_R1_001_(paired)_contig_17855	-1.8402	0.735826	11.1109	5.11155e-10	12.9511	9.47148e-07	0.00419222	0	9.2603	C3H7_ARATH Zinc finger CCCH domain-containing 7 OS=Arabidopsis thaliana OX=3702 GN=At1g21570 PE=1 SV=1
PPSMF1-1_S1_R1_001_(paired)_contig_45914	0.0153491	0.999936	9.38729	0.00351638	9.37194	0.00130356	0	0	8.63172	KN14J_ARATH Kinesin KIN-14J OS=Arabidopsis thaliana OX=3702 GN=KIN14J PE=1 SV=1
PPSMF1-1_S1_R1_001_(paired)_contig_26334	0.0153498	0.999936	9.1289	0.00454413	9.11355	0.00180956	0	0	7.21879	SYGM1_ARATH Glycine--tRNA mitochondrial 1 OS=Arabidopsis thaliana OX=3702 GN=At1g29880 PE=1 SV=1
PPSMF1-1_S1_R1_001_(paired)_contig_18514	0.0153498	0.999936	11.1298	0.000376514	11.1145	7.74264e-05	0	0	6.25295	AAMP_BOVIN Angio-associated migratory cell OS=Bos taurus OX=9913 GN=AAMP PE=2 SV=1
PPSMF1-1_S1_R1_001_(paired)_contig_3677	-0.242152	0.999936	10.6085	1.10706e-08	10.8506	1.07275e-09	0.00373968	0.00220117	5.93521	PCN_ARATH WD repeat-containing PCN OS=Arabidopsis thaliana OX=3702 GN=PCN PE=2 SV=1
PPSMF1-1_S1_R1_001_(paired)_contig_21540	0.0153498	0.999936	8.8639	0.00598733	8.84855	0.00256069	0	0	5.55094	FCL1_ARATH GDP-L-fucose synthase 1 OS=Arabidopsis thaliana OX=3702 GN=GER1 PE=1 SV=3
PPSMF1-1_S1_R1_001_(paired)_contig_22999	0.0153498	0.999936	9.61532	0.00272598	9.59997	0.000945819	0	0	5.45432	CNBL3_ARATH Calcineurin B 3 OS=Arabidopsis thaliana OX=3702 GN=CBL3 PE=1 SV=2
PPSMF1-1_S1_R1_001_(paired)_contig_12342	1.61181	0.800917	12.024	8.72151e-05	10.4122	8.36861e-09	0	0.00380134	5.31491	EHD3_ORYSJ PHD finger EHD3 OS=Oryza sativa japonica OX=39947 GN=EHD3 PE=1 SV=1
PPSMF1-1_S1_R1_001_(paired)_contig_44961	0.0151597	0.999936	11.4589	0.000284183	11.4438	5.56517e-05	0	0	5.01495	PGLR_VITVI Probable polygalacturonase OS=Vitis vinifera OX=29760 GN=GSVIVT00026920001 PE=1 SV=1

## Sheet: Table S3
Table S3. Differentially expressed cannabis transcripts homolog to genes associated with floral development, including anther/pollen development & flower organ identity.
Seq ID	IMFvFF log2FC	IMFvFF FDR	MFvFF log2FC	MFvFF FDR	IMFvMF log2FC	IMFvMF FDR	Mean RPKM FF (n=3)	Mean RPKM IMF (n=4)	Mean RPKM MF (n=2)	Annotation description	Functions
PPSIMF1-1_S3_R1_001_(paired)_contig_1511	11.8088	0	8.98294	0	2.82588	0.00066378	0.126724	459.233	51.9904	TKPR1_ARATH Tetraketide alpha-pyrone reductase 1 OS=Arabidopsis thaliana OX=3702 GN=TKPR1 PE=1 SV=1	Anther cuticle development and pollen wall formation
PPSIMF1-1_S3_R1_001_(paired)_contig_4570	11.8354	0	10.0136	0	1.82177	0.102811	0.184178	683.669	161.41	HTH_ARATH HOTHEAD OS=Arabidopsis thaliana OX=3702 GN=HTH PE=1 SV=1	Anther Cutin and pollen fertility
PPSFF1-1_S11_R1_001_(paired)_contig_27465	-5.00674	1.83704e-12	1.59166	0.145111	-6.5984	0	30.6612	0.958354	69.1478	MYB05_ANTMA Myb-related 305 OS=Antirrhinum majus OX=4151 GN=MYB305 PE=2 SV=1	Anther dehiscence and pollen development
PPSIMF1-1_S3_R1_001_(paired)_contig_950	10.8765	0	8.10663	0	2.76988	3.25477e-05	0.040625	77.2762	9.47564	AMS_ARATH Transcription factor ABORTED MICROSPORES OS=Arabidopsis thaliana OX=3702 GN=AMS PE=1 SV=2	Anther development
PPSMF1-1_S1_R1_001_(paired)_contig_27984	5.11132	3.24791e-13	4.37799	4.42441e-07	0.733334	0.684657	0.619086	20.9169	11.333	C3H15_ARATH Zinc finger CCCH domain-containing 15 OS=Arabidopsis thaliana OX=3702 GN=At1g68200 PE=2 SV=1	Anther development
PPSIMF1-1_S3_R1_001_(paired)_contig_12595	1.95249	0.00591105	4.06149	4.42239e-08	-2.10901	0.0121558	3.30188	12.7483	41.4248	BH089_ORYSJ Transcription factor BHLH089 OS=Oryza sativa japonica OX=39947 GN=BHLH089 PE=1 SV=1	Anther development
PPSMF1-1_S1_R1_001_(paired)_contig_12916	-1.28629	0.0500329	3.32218	2.39295e-07	-4.60847	0	21.1527	8.57464	164.38	MYBS3_ORYSJ Transcription factor MYBS3 OS=Oryza sativa japonica OX=39947 GN=MYBS3 PE=2 SV=1	Anther development and pollen maturation
PPSIMF1-1_S3_R1_001_(paired)_contig_2867	8.14385	0	5.71668	0	2.42717	0.00135047	0.508691	139.677	21.2634	BH091_ARATH Transcription factor bHLH91 OS=Arabidopsis thaliana OX=3702 GN=BHLH91 PE=2 SV=1	Anther devlopment
PPSIMF1-1_S3_R1_001_(paired)_contig_10587	3.31268	0.00849867	-0.166724	0.996203	3.4794	0.024136	0.848643	7.6473	0.558966	AGL14_ARATH Agamous-like MADS-box AGL14 OS=Arabidopsis thaliana OX=3702 GN=AGL14 PE=1 SV=2	Apical meristem transitions
PPSFF1-1_S11_R1_001_(paired)_contig_30850	-2.95888	0.0381298	-4.75706	0.0101568	1.79818	0.576953	5.04266	0.665341	0.15826	MYB38_MAIZE Myb-related Zm38 OS=Zea mays OX=4577 PE=2 SV=1	Axillary meristem
PPSFF1-1_S11_R1_001_(paired)_contig_27108	-3.32407	0.00222713	-5.60386	4.11213e-06	2.2798	0.163368	42.2613	4.5999	0.781466	MADS6_ORYSJ MADS-box transcription factor 6 OS=Oryza sativa japonica OX=39947 GN=MADS6 PE=1 SV=1	carpel formation
PPSFF1-1_S11_R1_001_(paired)_contig_14879	-3.82244	9.93991e-07	-8.33149	0	4.50905	2.84157e-05	42.3803	2.94982	0.105764	AGL11_ARATH Agamous-like MADS-box AGL11 OS=Arabidopsis thaliana OX=3702 GN=AGL11 PE=1 SV=1	Carpel/ ovule development
PPSFF1-1_S11_R1_001_(paired)_contig_39080	-3.85425	0.00441278	-8.12142	0.000146152	4.26717	0.121561	6.83909	0.461966	0.0177768	RADL1_ARATH RADIALIS-like 1 OS=Arabidopsis thaliana OX=3702 GN=RL1 PE=2 SV=1	floral development
PPSIMF1-1_S3_R1_001_(paired)_contig_14570	8.81697	0	9.28303	0	-0.466061	0.771046	0.235142	108.093	117.068	MADS2_PETHY Floral homeotic PMADS 2 OS=Petunia hybrida OX=4102 GN=PMADS2 PE=2 SV=1	Floral homeotic MADS2
PPSFF1-1_S11_R1_001_(paired)_contig_23827	-2.41969	0.000313608	-3.86529	2.89175e-07	1.4456	0.157105	41.5256	7.89614	2.41838	CMB1_DIACA MADS-box CMB1 OS=Dianthus caryophyllus OX=3570 GN=CMB1 PE=2 SV=1	Floral homeotic/ gametophyte development
PPSFF1-1_S11_R1_001_(paired)_contig_39699	-3.73438	0.0037164	-4.91074	0.00188235	1.17636	0.719805	5.1012	0.36078	0.116394	FBP24_PETHY MADS-box FBP24 OS=Petunia hybrida OX=4102 GN=FBP24 PE=1 SV=1	Floral homeotic/ gametophyte development
PPSIMF1-1_S3_R1_001_(paired)_contig_15178	-2.62273	0.159319	-3.0763	0.154413	0.453566	0.955669	40.2	7.46224	4.47757	AGL8_SOLTU Agamous-like MADS-box AGL8 homolog OS=Solanum tuberosum OX=4113 PE=2 SV=1	floral meristem identity
PPSFF1-1_S11_R1_001_(paired)_contig_12705	-1.7243	0.0273873	-2.58182	0.00299902	0.857525	0.564244	31.8945	9.78838	4.49713	AP1_SINAL Floral homeotic APETALA 1 OS=Sinapis alba OX=3728 GN=AP1 PE=2 SV=1	floral meristem identity
PPSIMF1-1_S3_R1_001_(paired)_contig_35890	2.23025	0.0743035	4.58903	0.000297026	-2.35878	0.133431	1.0727	4.95694	20.9884	FT_ARATH FLOWERING LOCUS T OS=Arabidopsis thaliana OX=3702 GN=FT PE=1 SV=2	floral transition
PPSMF1-1_S1_R1_001_(paired)_contig_38177	2.02827	0.0226327	4.85831	5.4498e-08	-2.83004	0.0036178	1.46293	5.86109	31.1075	AGL15_ARATH Agamous-like MADS-box AGL15 OS=Arabidopsis thaliana OX=3702 GN=AGL15 PE=1 SV=1	Floral transition
PPSFF1-1_S11_R1_001_(paired)_contig_11377	-2.00768	0.00710451	-2.49896	0.00401989	0.491277	0.806808	93.2104	24.334	13.7666	SPL5_ARATH Squamosa promoter-binding 5 OS=Arabidopsis thaliana OX=3702 GN=SPL5 PE=2 SV=1	floral meristem identity
PPSMF1-1_S1_R1_001_(paired)_contig_2323	-0.682956	0.41493	2.27815	0.00147433	-2.9611	5.42992e-06	21.5357	13.4329	78.6795	MAMYB_ARATH Transcription factor MAMYB OS=Arabidopsis thaliana OX=3702 GN=MAMYB PE=1 SV=1	flower development
PPSIMF1-1_S3_R1_001_(paired)_contig_17873	7.7715	2.75501e-10	5.84417	7.83155e-05	1.92733	0.273496	0.0316314	7.70927	1.73387	MYB35_ARATH Transcription factor MYB35 OS=Arabidopsis thaliana OX=3702 GN=MYB35 PE=2 SV=1	Flower development in tapetal cells
PPSIMF1-1_S3_R1_001_(paired)_contig_7239	8.76061	0	8.41562	0	0.344996	0.886269	0.299944	124.706	75.7731	AFC2_ARATH Serine threonine- kinase AFC2 OS=Arabidopsis thaliana OX=3702 GN=AFC2 PE=1 SV=1	Flower petal development
PPSMF1-1_S1_R1_001_(paired)_contig_45599	-2.79816	0.0500641	4.2048	0.00295075	-7.00295	7.75048e-08	0.770938	0.108042	10.2267	TFL1_ARATH TERMINAL FLOWER 1 OS=Arabidopsis thaliana OX=3702 GN=TFL1 PE=1 SV=1	Flowering time
PPSMF1-1_S1_R1_001_(paired)_contig_2624	1.34699	0.700829	7.58866	0.000130991	-6.24167	4.63393e-05	0.026418	0.0840673	5.28164	COL4_ARATH Zinc finger CONSTANS-LIKE 4 OS=Arabidopsis thaliana OX=3702 GN=COL4 PE=2 SV=2	Flowering time
PPSMF1-1_S1_R1_001_(paired)_contig_22812	0.0153051	0.999936	9.75777	0.00236141	-9.74247	0.000788442	0	0	8.0327	GIGAN_ARATH GIGANTEA OS=Arabidopsis thaliana OX=3702 GN=GI PE=1 SV=2	Flowering time
PPSMF1-1_S1_R1_001_(paired)_contig_42366	1.88324	0.136025	8.78553	0	-6.90229	9.00781e-14	0.139453	0.515683	50.531	NFYB7_ARATH Nuclear transcription factor Y subunit B-7 OS=Arabidopsis thaliana OX=3702 GN=NFYB7 PE=1 SV=1	Flowering time
PPSMF1-1_S1_R1_001_(paired)_contig_3055	4.50384	0.00710048	4.2375	0.0338791	0.26634	0.991459	0.0424634	0.997109	0.735874	SPL17_ORYSJ Squamosa promoter-binding 17 OS=Oryza sativa japonica OX=39947 GN=SPL17 PE=2 SV=2	Flowering time
PPSMF1-1_S1_R1_001_(paired)_contig_9685	5.94482	1.00632e-05	6.41426	5.97742e-05	-0.469435	0.935297	0.27204	15.8823	18.2622	COL2_ARATH Zinc finger CONSTANS-LIKE 2 OS=Arabidopsis thaliana OX=3702 GN=COL2 PE=1 SV=1	Flowering time
PPSIMF1-1_S3_R1_001_(paired)_contig_9871	3.92243	0.0506557	5.47832	0.0135059	-1.55588	0.708721	0.106266	1.66592	3.45024	NFYB8_ARATH Nuclear transcription factor Y subunit B-8 OS=Arabidopsis thaliana OX=3702 GN=NFYB8 PE=1 SV=1	Flowering time
PPSMF1-1_S1_R1_001_(paired)_contig_12342	1.61181	0.800917	12.024	8.72151e-05	-10.4122	8.36861e-09	0	0.00380134	5.31491	EHD3_ORYSJ PHD finger EHD3 OS=Oryza sativa japonica OX=39947 GN=EHD3 PE=1 SV=1	Flowering time
PPSFF1-1_S11_R1_001_(paired)_contig_11064	-1.73978	0.062248	-2.91728	0.00380344	1.1775	0.449452	10.9241	3.35362	1.13822	SCL28_ARATH Scarecrow 28 OS=Arabidopsis thaliana OX=3702 GN=SCL28 PE=1 SV=1	flowering time
PPSFF1-1_S11_R1_001_(paired)_contig_13607	-1.40684	0.296977	-4.00309	0.00134419	2.59625	0.0717624	10.1974	3.93215	0.545305	DOF34_ARATH Dof zinc finger OS=Arabidopsis thaliana OX=3702 GN= PE=1 SV=2	flowering time and reproductive organs
PPSFF1-1_S11_R1_001_(paired)_contig_16298	-2.58432	0.00328442	-4.86483	5.55889e-07	2.28051	0.0550259	22.3093	3.79517	0.622832	CRC_ARATH CRABS CLAW OS=Arabidopsis thaliana OX=3702 GN=CRC PE=1 SV=2	Gynoecium development
PPSMF1-1_S1_R1_001_(paired)_contig_22115	4.08879	1.79835e-12	4.05658	8.1144e-09	0.0322079	0.999985	2.55661	44.7265	33.347	CR26L_ARATH ECERIFERUM 26-like OS=Arabidopsis thaliana OX=3702 GN=CER26L PE=2 SV=1	Male fertility
PPSMF1-1_S1_R1_001_(paired)_contig_12532	1.16332	0.560422	6.90886	1.64009e-06	-5.74553	4.92813e-05	0.163916	0.358514	14.832	BZP61_ARATH Basic leucine zipper 61 OS=Arabidopsis thaliana OX=3702 GN=BZIP61 PE=1 SV=1	Male gametophyte
PPSMF1-1_S1_R1_001_(paired)_contig_28601	8.84502	0	8.76857	0	0.0764499	0.999985	0.0522648	24.2499	18.0317	EJ2_SOLLC MADS-box EJ2 OS=Solanum lycopersicum OX=4081 GN=EJ2 PE=1 SV=1	Meristem maturation and inflorescence architecture
PPSFF1-1_S11_R1_001_(paired)_contig_14751	-3.47406	0.0100143	-3.14271	0.0638075	-0.331343	0.970169	7.39096	0.634663	0.764813	JOIN_SOLLC MADS-box JOINTLESS OS=Solanum lycopersicum OX=4081 GN=J PE=1 SV=1	Meristem/ floral organ identity
PPSIMF1-1_S3_R1_001_(paired)_contig_8826	4.426	4.57587e-06	2.95618	0.0216458	1.46982	0.429494	1.78537	34.9842	11.1045	SEP2_ARATH Developmental SEPALLATA 2 OS=Arabidopsis thaliana OX=3702 GN=SEP2 PE=1 SV=1	Meristem/ flower organ identity
PPSMF1-1_S1_R1_001_(paired)_contig_32394	10.915	0	11.7385	0	-0.823408	0.522563	0.0120349	29.0316	39.2906	AG_ARATH Floral homeotic AGAMOUS OS=Arabidopsis thaliana OX=3702 GN=AG PE=1 SV=2	Organ identity/ formation of stamens
PPSMF1-1_S1_R1_001_(paired)_contig_42161	8.62925	0	6.76516	0	1.86408	0.0630039	0.354243	135.569	34.1047	NLTP8_ARATH Non-specific lipid-transfer 8 OS=Arabidopsis thaliana OX=3702 GN=LTP8 PE=3 SV=1	pollen and anther development
PPSIMF1-1_S3_R1_001_(paired)_contig_5253	11.0408	0	9.35279	0	1.68802	0.0370867	0.1144	241.874	60.5603	ATA1_ARATH Short-chain dehydrogenase reductase ATA1 OS=Arabidopsis thaliana OX=3702 GN=TA1 PE=2 SV=1	pollen and anther tapetal cells development
PPSMF1-1_S1_R1_001_(paired)_contig_45097	11.345	0	10.3	0	1.04504	0.429219	0.033344	95.321	40.1215	SHT_ARATH Spermidine hydroxycinnamoyl transferase OS=Arabidopsis thaliana OX=3702 GN=SHT PE=1 SV=1	pollen development
PPSFF1-1_S11_R1_001_(paired)_contig_11611	7.98263	0	8.24309	0	-0.26046	0.941756	1.13641	283.44	277.947	RDL4_ARATH Probable cysteine protease RDL4 OS=Arabidopsis thaliana OX=3702 GN=RDL4 PE=2 SV=1	Pollen development
PPSMF1-1_S1_R1_001_(paired)_contig_30365	12.0587	0	9.32054	0	2.73815	0.000322167	0.144044	619.189	74.2846	PKSA_ARATH Type III polyketide synthase A OS=Arabidopsis thaliana OX=3702 GN=PKSA PE=1 SV=1	Pollen development and Sporopollenin
PPSMF1-1_S1_R1_001_(paired)_contig_45310	4.35525	1.37919e-07	12.5811	0	-8.22585	0	0.0544844	1.13479	256.643	AGL66_ARATH Agamous-like MADS-box AGL66 OS=Arabidopsis thaliana OX=3702 GN=AGL66 PE=1 SV=1	Pollen Maturation and Tube Growth
PPSMF1-1_S1_R1_001_(paired)_contig_13337	1.72182	0.0202188	9.86603	0	-8.14421	0	0.759953	2.50124	521.499	MB101_ARATH Transcription factor MYB101 OS=Arabidopsis thaliana OX=3702 GN=MYB101 PE=2 SV=1	Pollen Tube development
PPSIMF1-1_S3_R1_001_(paired)_contig_1393	8.8463	0	10.944	0	-2.09767	0.0120453	0.503799	233.224	723.389	METK3_SOLLC S-adenosylmethionine synthase 3 OS=Solanum lycopersicum OX=4081 GN=SAM3 PE=2 SV=1	Pollen Tube Growth
PPSIMF1-1_S3_R1_001_(paired)_contig_3593	10.0721	0	7.29502	0	2.77704	6.80753e-05	0.20808	224.733	25.4438	EXGA_ASPOR Glucan 1,3-beta-glucosidase A OS=Aspergillus oryzae (strain ATCC 42149 RIB 40) OX=510516 GN=exgA PE=1 SV=1	pollen exine formation
PPSMF1-1_S1_R1_001_(paired)_contig_41157	2.79473	0.0361317	11.827	0	-9.03225	0	0.0270219	0.192798	78.4202	PRK6_ARATH Pollen receptor-like kinase 6 OS=Arabidopsis thaliana OX=3702 GN=PRK6 PE=1 SV=4	pollen tube growth
PPSFF1-1_S11_R1_001_(paired)_contig_27201	3.03095	0.001548	11.6604	0	-8.62943	0	0.0883695	0.804759	228.783	PRK1_ARATH Pollen receptor-like kinase 1 OS=Arabidopsis thaliana OX=3702 GN=PRK1 PE=1 SV=1	pollen tube growth
PPSFF1-1_S11_R1_001_(paired)_contig_31737	-9.81025	0.000351848	-9.45215	0.0184402	-0.358099	0.999985	4.32078	0	0	WOX9_ARATH WUSCHEL-related homeobox 9 OS=Arabidopsis thaliana OX=3702 GN=WOX9 PE=2 SV=1	Shoot apical meristem
PPSMF1-1_S1_R1_001_(paired)_contig_42123	6.04066	6.7908e-12	6.64607	1.02607e-10	-0.605402	0.816108	0.179027	11.6087	14.0723	WUS_PETHY WUSCHEL OS=Petunia hybrida OX=4102 GN=WUS PE=2 SV=1	Shoot meristem activity
PPSMF1-1_S1_R1_001_(paired)_contig_41070	11.9183	0	10.2679	0	1.65034	0.0606131	0.120594	467.918	123.235	C70A2_ARATH Cytochrome P450 703A2 OS=Arabidopsis thaliana OX=3702 GN=CYP703A2 PE=1 SV=1	Sporopollenin/ Fatty acid hydroxylases
PPSMF1-1_S1_R1_001_(paired)_contig_34274	3.58635	8.28003e-06	4.32786	4.24341e-06	-0.741501	0.710592	0.61267	7.42578	9.58761	TGA10_TOBAC bZIP transcription factor TGA10 OS=Nicotiana tabacum OX=4097 GN=TGA10 PE=1 SV=1	Stamen development
PPSMF1-1_S1_R1_001_(paired)_contig_45361	5.23698	0.149834	15.0402	6.22885e-08	-9.80326	0	0	0.0333381	23.7213	GNL2_ARATH ARF guanine-nucleotide exchange factor GNL2 OS=Arabidopsis thaliana OX=3702 GN=GNL2 PE=2 SV=1	Stamen growth
PPSIMF1-1_S3_R1_001_(paired)_contig_1814	11.8055	0	11.9038	0	-0.0982941	0.999985	0.0759545	278.023	238.025	AP3_ARATH Floral homeotic APETALA 3 OS=Arabidopsis thaliana OX=3702 GN=AP3 PE=1 SV=1	Stamen primordia Initiation
PPSFF1-1_S11_R1_001_(paired)_contig_24421	-9.79828	0	-13.5287	0.000149812	3.73042	0.591803	222.554	0.203196	0	NLTP1_PRUDU Non-specific lipid-transfer 1 OS=Prunus dulcis OX=3755 PE=3 SV=1	Stigma and style specific
PPSIMF1-1_S3_R1_001_(paired)_contig_23549	6.9416	1.08425e-08	4.28992	0.00638008	2.65168	0.100172	0.0588977	7.4121	1.07338	DYT1_ARATH Transcription factor DYT1 OS=Arabidopsis thaliana OX=3702 GN=DYT1 PE=2 SV=1	anther and Tapetal development
PPSIMF1-1_S3_R1_001_(paired)_contig_13046	8.87825	0	6.43855	0	2.43971	0.000669855	0.147687	70.7047	10.619	MYB80_ARATH Transcription factor MYB80 OS=Arabidopsis thaliana OX=3702 GN=MYB80 PE=1 SV=1	anther and Tapetal development

## Sheet: Table S4
Table S4. Differentially expressed genes associated with phytohormone metabolism and signalling.
Seq ID	IMFvFF log2FC	IMFvFF FDR	MFvFF log2FC	MFvFF FDR	IMFvMF log2FC	IMFvMF FDR	Mean RPKM FF (n=3)	Mean RPKM IMF (n=4)	Mean RPKM MF (n=2)	Annotation description	Pathways/signalings
PPSFF1-1_S11_R1_001_(paired)_contig_10667	-2.9948	0.000901183	-2.47498	0.0314559	-0.519816	0.854643	10.3817	1.2938	1.40549	ABAH1_ARATH Abscisic acid 8 -hydroxylase 1 OS=Arabidopsis thaliana OX=3702 GN=CYP707A1 PE=2 SV=1	ABA
PPSFF1-1_S11_R1_001_(paired)_contig_38985	-6.61326	4.73956e-12	-2.71714	0.038625	-3.89612	0.00184399	13.8814	0.135543	1.56496	BEN1_ARATH BRI1-5 ENHANCED 1 OS=Arabidopsis thaliana OX=3702 GN=BEN1 PE=2 SV=1	ABA
PPSMF1-1_S1_R1_001_(paired)_contig_45257	3.32764	0.00205818	12.4506	0	-9.123	0	0.285667	2.99737	1256.3	CAR4_ARATH C2-DOMAIN ABA-RELATED 4 OS=Arabidopsis thaliana OX=3702 GN=CAR4 PE=1 SV=1	ABA
PPSMF1-1_S1_R1_001_(paired)_contig_28358	-1.15831	0.333552	5.04568	1.62397e-07	-6.20399	4.24306e-12	0.740747	0.321217	18.5525	ABAH2_ARATH Abscisic acid 8 -hydroxylase 2 OS=Arabidopsis thaliana OX=3702 GN=CYP707A2 PE=2 SV=1	ABA
PPSFF1-1_S11_R1_001_(paired)_contig_32656	-3.43167	0.000938034	-1.27138	0.441156	-2.16029	0.161572	13.9314	1.3082	4.19947	ALDO3_ARATH Abscisic-aldehyde oxidase OS=Arabidopsis thaliana OX=3702 GN=AAO3 PE=1 SV=1	ABA
PPSMF1-1_S1_R1_001_(paired)_contig_4016	5.25274	0	4.98448	1.05769e-14	0.268265	0.907292	0.729814	28.1917	17.9559	2ABB_ARATH Serine threonine phosphatase 2A 55 kDa regulatory subunit B beta isoform OS=Arabidopsis thaliana OX=3702 GN=PP2AB2 PE=1 SV=1	ABA
PPSFF1-1_S11_R1_001_(paired)_contig_11015	-7.07088	4.57088e-13	-6.86728	2.70221e-08	-0.203601	0.995209	18.2456	0.141452	0.131333	CAR11_ARATH C2-DOMAIN ABA-RELATED 11 OS=Arabidopsis thaliana OX=3702 GN=CAR11 PE=1 SV=1	ABA
PPSMF1-1_S1_R1_001_(paired)_contig_3033	5.25045	5.1958e-09	5.15604	2.45451e-06	0.0944095	0.999985	0.441302	16.6613	13.1871	P2C52_ARATH Probable phosphatase 2C 52 OS=Arabidopsis thaliana OX=3702 GN=At4g03415 PE=2 SV=1	ABA
PPSIMF1-1_S3_R1_001_(paired)_contig_44953	4.50804	0.000682787	5.11741	0.00082773	-0.609375	0.883127	0.205418	4.97053	5.75964	NAC10_ORYSI NAC transcription factor ONAC010 OS=Oryza sativa indica OX=39946 GN=ONAC010 PE=3 SV=1	ABA
PPSMF1-1_S1_R1_001_(paired)_contig_11404	2.78919	6.00633e-06	4.83967	1.65334e-12	-2.05049	0.0101278	4.7408	31.5118	97.6439	KING1_ARATH SNF1-related kinase regulatory subunit gamma-1 OS=Arabidopsis thaliana OX=3702 GN=KING1 PE=1 SV=2	ABA
PPSMF1-1_S1_R1_001_(paired)_contig_15708	10.6143	0.000392064	13.2771	4.22041e-06	-2.66274	0.0363899	0	3.43524	15.6413	SAP11_ARATH Zinc finger AN1 and C2H2 domain-containing stress-associated 11 OS=Arabidopsis thaliana OX=3702 GN=SAP11 PE=2 SV=1	ABA
PPSMF1-1_S1_R1_001_(paired)_contig_27674	0.67508	0.490336	3.55407	2.18723e-06	-2.87899	0.000140669	8.8004	13.4575	76.5672	NAC72_ARATH NAC domain-containing 72 OS=Arabidopsis thaliana OX=3702 GN=NAC072 PE=2 SV=1	ABA
PPSMF1-1_S1_R1_001_(paired)_contig_1447	1.39679	0.523187	7.29874	2.33719e-06	-5.90194	4.87023e-05	0.0625014	0.164523	8.21684	VIP1_ARATH Transcription factor VIP1 OS=Arabidopsis thaliana OX=3702 GN=VIP1 PE=1 SV=1	ABA
PPSFF1-1_S11_R1_001_(paired)_contig_23803	-2.71707	0.00159097	-2.20822	0.0452187	-0.50885	0.847861	38.8157	6.13512	6.70206	IAA17_ARATH Auxin-responsive IAA17 OS=Arabidopsis thaliana OX=3702 GN=IAA17 PE=1 SV=2	Auxin
PPSMF1-1_S1_R1_001_(paired)_contig_2163	-2.40319	0.0203981	-2.4527	0.0509914	0.0495158	0.999985	27.0649	5.41786	4.20903	IAA27_ARATH Auxin-responsive IAA27 OS=Arabidopsis thaliana OX=3702 GN=IAA27 PE=1 SV=1	Auxin
PPSFF1-1_S11_R1_001_(paired)_contig_32458	-4.72937	3.14323e-06	-2.78716	0.0424339	-1.94221	0.268968	20.8987	0.790569	2.30419	SAU50_ARATH Auxin-responsive SAUR50 OS=Arabidopsis thaliana OX=3702 GN=SAUR50 PE=1 SV=1	auxin
PPSFF1-1_S11_R1_001_(paired)_contig_4532	-1.16931	0.317609	-6.26663	4.67979e-11	5.09733	5.83978e-08	36.917	17.7396	0.348154	TPR1_ARATH Topless-related 1 OS=Arabidopsis thaliana OX=3702 GN=TPR1 PE=1 SV=3	Auxin
PPSFF1-1_S11_R1_001_(paired)_contig_8179	-4.78815	1.29343e-13	-4.29491	7.56368e-08	-0.493239	0.814155	49.665	1.7936	1.9133	IAA3_ARATH Auxin-responsive IAA3 OS=Arabidopsis thaliana OX=3702 GN=IAA3 PE=1 SV=1	Auxin
PPSFF1-1_S11_R1_001_(paired)_contig_2457	-1.74473	0.00736265	-1.66392	0.0384728	-0.0808171	0.999985	223.752	65.848	56.0609	AX22D_VIGRR Auxin-induced 22D OS=Vigna radiata radiata OX=3916 GN=AUX22D PE=2 SV=1	Auxin
PPSIMF1-1_S3_R1_001_(paired)_contig_14958	8.32492	1.78373e-11	8.9058	6.71544e-11	-0.580876	0.8526	0.0428517	15.1473	16.2577	A10A5_SOYBN Auxin-induced 10A5 OS=Glycine max OX=3847 PE=2 SV=1	Auxin
PPSIMF1-1_S3_R1_001_(paired)_contig_25065	9.64528	0.00210279	10.0892	0.00140285	-0.443879	0.926171	0	3.6386	3.50617	AX10A_SOYBN Auxin-induced X10A OS=Glycine max OX=3847 PE=2 SV=1	Auxin
PPSFF1-1_S11_R1_001_(paired)_contig_39553	-3.73888	0.00116273	-2.99241	0.0431809	-0.746469	0.829728	6.6488	0.484937	0.621846	SAU22_ARATH Auxin-responsive SAUR22 OS=Arabidopsis thaliana OX=3702 GN=SAUR22 PE=2 SV=1	Auxin
PPSFF1-1_S11_R1_001_(paired)_contig_6967	-1.70449	0.102873	-4.61711	5.86376e-06	2.91262	0.00920471	17.9696	5.70345	0.640382	LAX2_ARATH Auxin transporter 2 OS=Arabidopsis thaliana OX=3702 GN=LAX2 PE=2 SV=1	Auxin
PPSFF1-1_S11_R1_001_(paired)_contig_466	-2.41293	0.0553448	-8.09328	3.03052e-11	5.68035	4.76186e-06	103.038	21.2911	0.324417	IAA9_ARATH Auxin-responsive IAA9 OS=Arabidopsis thaliana OX=3702 GN=IAA9 PE=1 SV=1	Auxin
PPSIMF1-1_S3_R1_001_(paired)_contig_1919	-1.1062	0.207607	-3.02779	0.000230037	1.92159	0.0383729	11.7437	5.60928	1.19048	ARFE_ARATH Auxin response factor 5 OS=Arabidopsis thaliana OX=3702 GN=ARF5 PE=1 SV=3	Auxin
PPSMF1-1_S1_R1_001_(paired)_contig_45327	2.69151	0.348137	9.39433	1.08548e-05	-6.70281	5.02111e-05	0.0171279	0.130471	11.4752	SAU66_ARATH Auxin-responsive SAUR66 OS=Arabidopsis thaliana OX=3702 GN=SAUR66 PE=2 SV=1	Auxin
PPSIMF1-1_S3_R1_001_(paired)_contig_2259	7.73885	0	7.37671	0	0.362134	0.887923	0.0725044	15.4056	9.58174	ARR12_ARATH Two-component response regulator ARR12 OS=Arabidopsis thaliana OX=3702 GN=ARR12 PE=2 SV=2	Cytokinin
PPSIMF1-1_S3_R1_001_(paired)_contig_12814	8.22827	1.79975e-08	8.56373	9.13757e-08	-0.335465	0.951567	0.0295096	10.8626	10.2868	ARR10_ARATH Two-component response regulator ARR10 OS=Arabidopsis thaliana OX=3702 GN=ARR10 PE=1 SV=1	Cytokinin
PPSIMF1-1_S3_R1_001_(paired)_contig_9481	2.54548	0.00248247	2.11355	0.0486866	0.431935	0.872313	4.71431	26.5526	16.3334	ARR17_ARATH Two-component response regulator ARR17 OS=Arabidopsis thaliana OX=3702 GN=ARR17 PE=2 SV=1	Cytokinin
PPSMF1-1_S1_R1_001_(paired)_contig_10174	2.15996	0.0510801	2.74712	0.0294785	-0.58716	0.848415	1.62089	6.9503	8.60018	ARR9_ARATH Two-component response regulator ARR9 OS=Arabidopsis thaliana OX=3702 GN=ARR9 PE=1 SV=1	Cytokinin
PPSFF1-1_S11_R1_001_(paired)_contig_40391	9.09824	0.00405059	8.8513	0.0063228	0.246942	0.98073	0	8.11839	5.37187	ORR24_ORYSJ Two-component response regulator ORR24 OS=Oryza sativa japonica OX=39947 GN=RR24 PE=2 SV=1	Cytokinin
PPSIMF1-1_S3_R1_001_(paired)_contig_12359	8.09504	0	5.20413	1.01473e-07	2.8909	0.0028027	0.0939688	25.6488	3.1052	ACCO5_ARATH 1-aminocyclopropane-1-carboxylate oxidase 5 OS=Arabidopsis thaliana OX=3702 GN=At1g77330 PE=2 SV=1	Ethylene
PPSMF1-1_S1_R1_001_(paired)_contig_45888	6.0029	1.13865e-08	5.91565	2.06532e-06	0.0872494	0.999985	0.323332	21.7059	16.1988	WIN1_ARATH Ethylene-responsive transcription factor WIN1 OS=Arabidopsis thaliana OX=3702 GN=WIN1 PE=2 SV=1	Ethylene
PPSMF1-1_S1_R1_001_(paired)_contig_8134	2.07238	0.00713404	3.36724	6.57444e-05	-1.29487	0.283775	2.35651	9.60015	18.9073	ERS1_ARATH Ethylene response sensor 1 OS=Arabidopsis thaliana OX=3702 GN=ERS1 PE=1 SV=1	Ethylene
PPSFF1-1_S11_R1_001_(paired)_contig_6592	-7.99019	9.52936e-08	-1.35492	0.586664	-6.63527	0.000199649	5.154	0.0179812	1.87116	EER5_ARATH Enhanced ethylene response 5 OS=Arabidopsis thaliana OX=3702 GN=EER5 PE=1 SV=1	Ethylene
PPSMF1-1_S1_R1_001_(paired)_contig_45077	-1.70241	0.518968	6.83712	7.09449e-06	-8.53953	2.65107e-07	0.128526	0.037047	10.792	ERF98_ARATH Ethylene-responsive transcription factor ERF098 OS=Arabidopsis thaliana OX=3702 GN=ERF098 PE=1 SV=1	Ethylene
PPSFF1-1_S11_R1_001_(paired)_contig_18796	-9.97303	0.000443805	-2.18521	0.286803	-7.78781	0.0177	6.72344	0	1.354	EF106_ARATH Ethylene-responsive transcription factor ERF106 OS=Arabidopsis thaliana OX=3702 GN=ERF106 PE=2 SV=1	Ethylene
PPSFF1-1_S11_R1_001_(paired)_contig_19846	-3.05324	0.01794	-4.72548	0.00173731	1.67224	0.502487	5.00277	0.591129	0.167938	AIL5_ARATH AP2-like ethylene-responsive transcription factor AIL5 OS=Arabidopsis thaliana OX=3702 GN=AIL5 PE=2 SV=2	Ethylene
PPSMF1-1_S1_R1_001_(paired)_contig_9782	-0.917526	0.549082	-3.38956	0.00825461	2.47204	0.0901565	5.77998	3.0395	0.457062	ESR2_ARATH Ethylene-responsive transcription factor ESR2 OS=Arabidopsis thaliana OX=3702 GN=ESR2 PE=1 SV=1	Ethylene
PPSFF1-1_S11_R1_001_(paired)_contig_27013	-2.39819	0.0449888	-2.29077	0.12468	-0.10742	0.999985	6.53312	1.23443	1.07571	ERF03_ARATH Ethylene-responsive transcription factor ERF003 OS=Arabidopsis thaliana OX=3702 GN=ERF003 PE=2 SV=1	Ethylene
PPSFF1-1_S11_R1_001_(paired)_contig_5386	-1.63597	0.114301	-1.63472	0.196602	-0.00125102	0.999985	10.8699	3.84713	2.76909	ETR2_ARATH Ethylene receptor 2 OS=Arabidopsis thaliana OX=3702 GN=ETR2 PE=1 SV=2	Ethylene
PPSIMF1-1_S3_R1_001_(paired)_contig_5450	0.605179	0.520448	3.39233	1.68552e-06	-2.78715	8.86109e-05	106.428	158.292	831.43	ACCO3_PETHY 1-aminocyclopropane-1-carboxylate oxidase 3 OS=Petunia hybrida OX=4102 GN=ACO3 PE=3 SV=1	Ethylene
PPSIMF1-1_S3_R1_001_(paired)_contig_1940	6.35449	0	6.54715	0	-0.192659	0.953464	2.66625	217.577	205.79	CGS1_ARATH Cystathionine gamma-synthase chloroplastic OS=Arabidopsis thaliana OX=3702 GN=CGS1 PE=1 SV=3	Ethylene/ spermidine
PPSFF1-1_S11_R1_001_(paired)_contig_12357	-1.87668	0.00163041	-1.2173	0.135426	-0.65938	0.599592	29.0011	7.90007	9.50799	GID1B_ARATH Gibberellin receptor GID1B OS=Arabidopsis thaliana OX=3702 GN=GID1B PE=1 SV=1	GA
PPSIMF1-1_S3_R1_001_(paired)_contig_4441	12.0912	0	12.0427	0	0.0485582	0.999985	0.0423148	195.791	153.078	GASA4_ARATH Gibberellin-regulated 4 OS=Arabidopsis thaliana OX=3702 GN=GASA4 PE=1 SV=2	GA
PPSFF1-1_S11_R1_001_(paired)_contig_18343	1.67521	0.213035	3.12115	0.0208259	-1.44594	0.47744	1.74922	5.66993	11.4613	SPL16_ORYSJ Squamosa promoter-binding 16 OS=Oryza sativa japonica OX=39947 GN=SPL16 PE=2 SV=1	GA
PPSMF1-1_S1_R1_001_(paired)_contig_408	3.32132	0.0051053	5.82192	3.68434e-06	-2.50059	0.106387	0.174751	1.74829	7.90694	PAT1_ARATH Scarecrow-like transcription factor PAT1 OS=Arabidopsis thaliana OX=3702 GN=PAT1 PE=2 SV=1	GA
PPSMF1-1_S1_R1_001_(paired)_contig_40177	0.402722	0.914718	9.90748	6.99753e-14	-9.50476	0	0.0324986	0.0466979	24.8219	G3OX3_ARATH Gibberellin 3-beta-dioxygenase 3 OS=Arabidopsis thaliana OX=3702 GN=GA3OX3 PE=2 SV=1	GA
PPSMF1-1_S1_R1_001_(paired)_contig_37562	-1.46242	0.314492	2.16078	0.156716	-3.6232	0.00618999	1.64092	0.590005	5.35747	G2OX2_PEA Gibberellin 2-beta-dioxygenase 2 OS=Pisum sativum OX=3888 GN=GA2OX2 PE=2 SV=1	GA
PPSFF1-1_S11_R1_001_(paired)_contig_3547	-3.08085	0.000994042	-5.48356	8.77197e-08	2.40271	0.0573868	63.132	7.63761	1.31761	PHSC_ARATH Probable polyamine transporter At3g13620 OS=Arabidopsis thaliana OX=3702 GN=At3g13620 PE=2 SV=1	polyamine

## Sheet: Table S5
Table S5. Differentially expressed genes related to sugar/lipid metabolisms, cell wall and membrane formations, and other male-specific genes.
Seq ID	IMFvFF log2FC	IMFvFF FDR	MFvFF log2FC	MFvFF FDR	IMFvMF log2FC	IMFvMF FDR	Mean RPKM FF (n=3)	Mean RPKM IMF (n=4)	Mean RPKM MF (n=2)	Annotation description	Pathways/ signaling
PPSIMF1-1_S3_R1_001_(paired)_contig_1130	11.0766	0	9.9514	0	1.12517	0.426921	2.42963	5109.93	1958.26	MEN8_SILLA MEN-8 OS=Silene latifolia OX=37657 GN=MEN-8 PE=3 SV=1	Male-specific
PPSIMF1-1_S3_R1_001_(paired)_contig_449	5.47105	0	5.14707	0	0.323975	0.873576	12.848	561.886	351.762	G3P_ATRNU Glyceraldehyde-3-phosphate dehydrogenase OS=Atriplex nummularia OX=3553 PE=2 SV=1	sugar
PPSMF1-1_S1_R1_001_(paired)_contig_39890	11.2347	0	8.88118	1.91958e-11	2.35356	0.219941	0.56505	1328.4	249.717	LEC_PARPC Mannose glucose-specific lectin (Fragment) OS=Parkia platycephala OX=185447 PE=1 SV=1	Sugar
PPSMF1-1_S1_R1_001_(paired)_contig_19365	10.8318	0	9.04856	0	1.7832	0.0522502	0.20736	376.502	91.5724	4CLL1_ARATH 4-coumarate-- ligase-like 1 OS=Arabidopsis thaliana OX=3702 GN=4CLL1 PE=1 SV=1	Flavonoids
PPSMF1-1_S1_R1_001_(paired)_contig_33864	10.0187	0	8.83696	2.08313e-14	1.1817	0.619575	0.642138	625.898	237.114	CYSEP_PHAVU Vignain OS=Phaseolus vulgaris OX=3885 PE=2 SV=2	.
PPSIMF1-1_S3_R1_001_(paired)_contig_11272	8.18468	0	5.16885	1.17405e-11	3.01583	0.000118273	1.12396	317.79	32.0399	TLP1_PYRPY Thaumatin 1 OS=Pyrus pyrifolia OX=3767 GN=TL1 PE=1 SV=1	.
PPSIMF1-1_S3_R1_001_(paired)_contig_4184	11.0607	0	10.011	0	1.04973	0.326864	0.0972431	212.454	81.0216	H2A5_ARATH Probable histone OS=Arabidopsis thaliana OX=3702 GN=At5g27670 PE=1 SV=1	.
PPSIMF1-1_S3_R1_001_(paired)_contig_2893	7.56101	0	7.35894	0	0.20207	0.964144	1.44908	269.949	194.929	RNS3_ARATH Ribonuclease 3 OS=Arabidopsis thaliana OX=3702 GN=RNS3 PE=2 SV=1	.
PPSMF1-1_S1_R1_001_(paired)_contig_1381	8.79623	0	8.64734	0	0.148887	0.982137	0.494554	216.471	151.669	VATG1_ARATH V-type proton ATPase subunit G1 OS=Arabidopsis thaliana OX=3702 GN=VHA-G1 PE=1 SV=1	.
PPSMF1-1_S1_R1_001_(paired)_contig_44504	10.5342	0	7.91061	0	2.62357	0.011543	0.154108	228.467	31.6043	PGIP_VITVI Polygalacturonase inhibitor OS=Vitis vinifera OX=29760 GN=pgip PE=1 SV=1	Cell wall
PPSIMF1-1_S3_R1_001_(paired)_contig_1912	3.01854	8.46354e-06	3.47847	1.55616e-05	-0.459932	0.824433	26.9484	206.428	214.892	GGAP2_ARATH GDP-L-galactose phosphorylase 2 OS=Arabidopsis thaliana OX=3702 GN=VTC5 PE=1 SV=1	Sugar
PPSIMF1-1_S3_R1_001_(paired)_contig_3393	8.30306	0	7.79711	0	0.505946	0.731231	0.517548	161.301	88.9715	RS13_SOYBN 40S ribosomal S13 OS=Glycine max OX=3847 GN=RPS13 PE=2 SV=1	stress protein/ tRNA synthase
PPSIMF1-1_S3_R1_001_(paired)_contig_411	9.57696	0	8.38274	1.65108e-13	1.19422	0.568768	0.197564	153.564	62.1819	RL362_ARATH 60S ribosomal L36-2 OS=Arabidopsis thaliana OX=3702 GN=RPL36B PE=3 SV=1	protein synthesis
PPSMF1-1_S1_R1_001_(paired)_contig_1824	7.07148	0	6.99896	0	0.0725257	0.999985	1.14863	153.932	117.483	PLDA1_ARATH Phospholipase D alpha 1 OS=Arabidopsis thaliana OX=3702 GN=PLDALPHA1 PE=1 SV=2	Membrane/ lipids
PPSIMF1-1_S3_R1_001_(paired)_contig_13115	8.74757	0	2.96847	0.01693	5.7791	1.31158e-08	0.446314	174.449	2.58886	NIP61_ARATH Aquaporin NIP6-1 OS=Arabidopsis thaliana OX=3702 GN=NIP6-1 PE=1 SV=1	Transporter
PPSMF1-1_S1_R1_001_(paired)_contig_249	5.72619	0	5.04223	0	0.683963	0.593617	1.85869	98.5505	47.3925	PMA11_ARATH ATPase plasma membrane-type OS=Arabidopsis thaliana OX=3702 GN=AHA11 PE=1 SV=1	Plasma membrane
PPSMF1-1_S1_R1_001_(paired)_contig_6272	11.4011	0	10.8965	0	0.504594	0.805935	0.0378811	117.114	66.6327	CHLP_TOBAC Geranylgeranyl diphosphate chloroplastic OS=Nicotiana tabacum OX=4097 GN=CHLP PE=2 SV=1	terpenoids/GA
PPSMF1-1_S1_R1_001_(paired)_contig_3307	9.37888	0	9.25344	0	0.125436	0.995473	0.188665	120.647	85.3914	EB1B_ARATH Microtubule-associated RP EB family member 1B OS=Arabidopsis thaliana OX=3702 GN=EB1B PE=1 SV=1	cell wall
PPSMF1-1_S1_R1_001_(paired)_contig_17641	3.76588	5.23275e-12	1.66462	0.0338708	2.10126	0.0040617	8.79734	115.28	23.2924	AL2B7_ARATH Aldehyde dehydrogenase family 2 member mitochondrial OS=Arabidopsis thaliana OX=3702 GN=ALDH2B7 PE=1 SV=2	stress protein
PPSIMF1-1_S3_R1_001_(paired)_contig_16220	3.78883	1.4168e-08	0.809764	0.507021	2.97907	0.000326716	10.6082	136.949	13.8204	CYB5E_ARATH Cytochrome b5 isoform E OS=Arabidopsis thaliana OX=3702 GN=CYTB5-E PE=1 SV=2	lipids
PPSIMF1-1_S3_R1_001_(paired)_contig_6700	9.84772	0	8.56605	0	1.28167	0.286693	0.106549	97.5475	32.4689	PRX2E_ARATH Peroxiredoxin- chloroplastic OS=Arabidopsis thaliana OX=3702 GN=PRXIIE PE=1 SV=2	.
PPSIMF1-1_S3_R1_001_(paired)_contig_4086	4.13746	3.39425e-14	2.71179	0.00013592	1.42567	0.0983355	4.24257	73.1141	23.1795	HMGYA_ARATH HMG-Y-related A OS=Arabidopsis thaliana OX=3702 GN=HMGA PE=1 SV=1	terpenoids
PPSIMF1-1_S3_R1_001_(paired)_contig_3832	6.86266	0	8.22121	0	-1.35855	0.115922	0.831339	95.015	188.8	SWT6B_ORYSJ Bidirectional sugar transporter SWEET6b OS=Oryza sativa japonica OX=39947 GN=SWEET6B PE=2 SV=1	sugar
PPSIMF1-1_S3_R1_001_(paired)_contig_25476	12.0969	0	11.4145	0	0.682387	0.592363	0.0233699	112.509	55.4518	HPSE1_ARATH Heparanase 1 OS=Arabidopsis thaliana OX=3702 GN=At5g07830 PE=2 SV=1	stress protein
PPSMF1-1_S1_R1_001_(paired)_contig_5091	9.45955	0	8.84211	0	0.617436	0.74532	0.0995696	72.9835	36.3067	CSPL4_VITVI CASP 1F1 OS=Vitis vinifera OX=29760 GN=VIT_17s0000g00560 PE=2 SV=2	..
PPSIMF1-1_S3_R1_001_(paired)_contig_5481	9.62397	0	7.73579	1.9898e-10	1.88818	0.271273	0.132451	99.2196	23.9341	ADT1_SOLTU ADP,ATP carrier mitochondrial OS=Solanum tuberosum OX=4113 GN=ANT PE=2 SV=1	Sugar
PPSIMF1-1_S3_R1_001_(paired)_contig_1865	3.3881	3.57692e-11	3.00488	2.223e-06	0.383226	0.813213	8.39594	87.0554	53.2505	ASOL_TOBAC L-ascorbate oxidase homolog OS=Nicotiana tabacum OX=4097 PE=2 SV=1	stress protein
PPSIMF1-1_S3_R1_001_(paired)_contig_10347	9.20694	0	9.90521	0	-0.69827	0.714985	0.129633	79.1399	97.6903	S61G2_ARATH transport Sec61 subunit gamma-2 OS=Arabidopsis thaliana OX=3702 GN=SEC61G2 PE=1 SV=1	Transporter
PPSMF1-1_S1_R1_001_(paired)_contig_3496	6.4981	0	5.57485	0	0.923251	0.454993	0.754964	70.8744	29.3474	RH56_ARATH DEAD-box ATP-dependent RNA helicase 56 OS=Arabidopsis thaliana OX=3702 GN=RH56 PE=1 SV=2	stress protein (cold-induced)
PPSIMF1-1_S3_R1_001_(paired)_contig_9501	3.12117	2.33782e-08	1.82458	0.0171057	1.29659	0.149091	9.17257	77.4451	26.4128	MUB3_ORYSJ Membrane-anchored ubiquitin-fold 3 OS=Oryza sativa japonica OX=39947 GN=MUB3 PE=3 SV=1	Ubiqutination
PPSMF1-1_S1_R1_001_(paired)_contig_5432	8.1842	0	7.8642	0	0.320001	0.886984	0.234669	66.5802	41.301	CPP1_ARATH CHAPERONE-LIKE PROTEIN OF chloroplastic OS=Arabidopsis thaliana OX=3702 GN=CPP1 PE=1 SV=1	stress protein (heat-shock)
PPSIMF1-1_S3_R1_001_(paired)_contig_4151	8.80004	0	7.44106	0	1.35898	0.157781	0.128098	56.3818	17.8447	DXR_ARATH 1-deoxy-D-xylulose 5-phosphate chloroplastic OS=Arabidopsis thaliana OX=3702 GN=DXR PE=2 SV=2	terpenoids
PPSMF1-1_S1_R1_001_(paired)_contig_1798	9.38842	0	10.0333	0	-0.644887	0.636358	0.0769328	51.7888	60.1879	KPYC1_ORYSJ Pyruvate kinase cytosolic OS=Oryza sativa japonica OX=39947 GN=Os11g0148500 PE=1 SV=1	Sugar
PPSMF1-1_S1_R1_001_(paired)_contig_13857	7.94779	0	2.72912	0.0460641	5.21866	2.30578e-06	0.279997	63.6989	1.6866	MSRA_FRAAN Peptide methionine sulfoxide reductase OS=Fragaria ananassa OX=3747 PE=2 SV=2	stress protein
PPSIMF1-1_S3_R1_001_(paired)_contig_19332	7.49409	5.96153e-13	3.48753	0.0164898	4.00656	0.00237227	0.399396	68.0553	3.81868	FABI_ARATH Enoyl-[acyl-carrier- ] reductase	lipids
PPSFF1-1_S11_R1_001_(paired)_contig_9350	3.15226	0.0002502	1.63689	0.191115	1.51537	0.29489	6.4135	54.9245	18.1549	BARW_HORVU Barwin OS=Hordeum vulgare OX=4513 PE=1 SV=1	defenese
PPSIMF1-1_S3_R1_001_(paired)_contig_5111	11.1683	0	10.2521	0	0.916242	0.39158	0.0249552	60.9381	26.2239	C98A2_SOYBN Cytochrome P450 98A2 OS=Glycine max OX=3847 GN=CYP98A2 PE=2 SV=1	Lignin /flavonoids
PPSIMF1-1_S3_R1_001_(paired)_contig_5889	3.16175	1.17574e-08	2.36293	0.000998236	0.798814	0.496289	6.23312	53.444	25.6126	RBS_MARPA Ribulose bisphosphate carboxylase small chloroplastic OS=Marchantia paleacea OX=56867 GN=RBCS PE=2 SV=1	photosynthesis
PPSMF1-1_S1_R1_001_(paired)_contig_801	5.74429	1.03856e-06	5.81942	4.61113e-05	-0.0751351	0.999985	0.823174	42.2087	43.852	DHAR2_ARATH Glutathione S-transferase DHAR2 OS=Arabidopsis thaliana OX=3702 GN=DHAR2 PE=1 SV=1	stress protein
PPSIMF1-1_S3_R1_001_(paired)_contig_3232	3.56911	2.1719e-05	4.55755	3.09971e-06	-0.98844	0.594996	5.63515	60.0838	95.9513	CDKF4_ORYSJ Cyclin-dependent kinase F-4 OS=Oryza sativa japonica OX=39947 GN=CDKF-4 PE=2 SV=1	cell cycle
PPSMF1-1_S1_R1_001_(paired)_contig_11834	8.39683	1.05677e-12	8.45538	1.14408e-09	-0.058548	0.999985	0.132898	44.5308	39.0533	UBC36_ARATH Ubiquitin-conjugating enzyme E2 36 OS=Arabidopsis thaliana OX=3702 GN=UBC36 PE=1 SV=1	Ubiqutination
PPSMF1-1_S1_R1_001_(paired)_contig_4181	9.77571	0	9.33956	0	0.436142	0.826336	0.0381048	34.9352	20.48	GSA_TOBAC Glutamate-1-semialdehyde 2,1- chloroplastic OS=Nicotiana tabacum OX=4097 GN=GSA PE=2 SV=1	chlorophyll
PPSIMF1-1_S3_R1_001_(paired)_contig_7471	2.54343	1.61715e-05	2.43713	0.000806179	0.106293	0.994509	6.21283	36.3106	24.5993	UTR2_ARATH UDP-galactose UDP-glucose transporter 2 OS=Arabidopsis thaliana OX=3702 GN=UTR2 PE=2 SV=1	Sugar
PPSIMF1-1_S3_R1_001_(paired)_contig_15940	13.321	4.88723e-06	13.9786	2.17703e-06	-0.657583	0.855337	0	54.83	70.5719	AAPC_CENCI glucose-6-phosphate 1-epimerase OS=Cenchrus ciliaris OX=35872 PE=2 SV=1	Sugar
PPSMF1-1_S1_R1_001_(paired)_contig_4097	6.58857	0	6.9189	0	-0.330331	0.879896	0.34998	34.784	34.2314	PS10B_ARATH 26S proteasome regulatory subunit S10B homolog B OS=Arabidopsis thaliana OX=3702 GN=RPT4B PE=1 SV=1	Ubiqutination
PPSMF1-1_S1_R1_001_(paired)_contig_1801	7.19322	0	5.87634	0	1.31689	0.13858	0.227822	32.7789	10.939	PALY_POPTR Phenylalanine ammonia-lyase OS=Populus trichocarpa OX=3694 GN=PAL PE=2 SV=1	phenylpropanoid
PPSMF1-1_S1_R1_001_(paired)_contig_5572	2.69616	0.000395339	2.62057	0.00508501	0.0755869	0.999985	8.43805	50.3671	39.1202	MPK10_ORYSJ Mitogen-activated kinase 10 OS=Oryza sativa japonica OX=39947 GN=MPK10 PE=2 SV=2	cell division/ stress
PPSMF1-1_S1_R1_001_(paired)_contig_588	3.41339	2.12598e-06	3.42169	9.9291e-05	-0.00829566	0.999985	5.4282	53.2012	45.2728	GLGS2_VICFA Glucose-1-phosphate adenylyltransferase small subunit chloroplastic OS=Vicia faba OX=3906 GN=AGPP PE=2 SV=1	Sugar
PPSIMF1-1_S3_R1_001_(paired)_contig_1734	4.73706	1.12598e-06	5.15696	9.71979e-06	-0.419896	0.91901	1.35865	36.6185	34.5476	NCPR_CATRO NADPH--cytochrome P450 reductase OS=Catharanthus roseus OX=4058 GN=CPR PE=2 SV=1	stress/detoxification
PPSMF1-1_S1_R1_001_(paired)_contig_45767	9.88468	9.92315e-10	9.3925	5.56945e-08	0.492181	0.878571	0.0353608	46.1322	26.3398	COPT6_ARATH Copper transporter 6 OS=Arabidopsis thaliana OX=3702 GN=COPT6 PE=2 SV=1	Transporter
PPSIMF1-1_S3_R1_001_(paired)_contig_349	9.57251	0	9.53205	0	0.0404622	0.999985	0.0342461	29.094	19.9237	PFPB_RICCO Pyrophosphate--fructose 6-phosphate 1-phosphotransferase subunit beta OS=Ricinus communis OX=3988 GN=PFP-BETA PE=3 SV=1	Sugar
PPSIMF1-1_S3_R1_001_(paired)_contig_30372	4.46216	1.21543e-12	4.28936	2.07373e-08	0.172799	0.972651	2.20936	48.705	34.9721	FLS_CITUN Flavonol synthase flavanone 3-hydroxylase OS=Citrus unshiu OX=55188 GN=FLS PE=1 SV=1	Flavonoids
PPSIMF1-1_S3_R1_001_(paired)_contig_9276	9.05174	0	7.3873	1.05769e-14	1.66444	0.13773	0.0605431	34.0339	8.32156	S6PD_MALDO NADP-dependent D-sorbitol-6-phosphate dehydrogenase OS=Malus domestica OX=3750 GN=S6PDH PE=2 SV=1	Sugar/ stress
PPSMF1-1_S1_R1_001_(paired)_contig_2728	3.65766	3.69603e-11	4.37194	2.28665e-11	-0.71428	0.576031	2.67552	33.3483	42.2138	HOX20_ORYSJ Homeobox-leucine zipper HOX20 OS=Oryza sativa japonica OX=39947 GN=HOX20 PE=2 SV=1	cell differentiation/anthocynin
PPSIMF1-1_S3_R1_001_(paired)_contig_9835	1.8478	0.00536605	0.83054	0.413945	1.01726	0.363101	8.90123	32.7458	13.2085	ZIP8_ARATH Probable zinc transporter 8 OS=Arabidopsis thaliana OX=3702 GN=ZIP8 PE=3 SV=1	transporter
PPSIMF1-1_S3_R1_001_(paired)_contig_2512	8.22164	0	8.79036	0	-0.568723	0.794219	0.11525	34.704	39.4139	AMO2_ARTS1 Copper methylamine oxidase OS=Arthrobacter (strain P1) OX=47915 GN=maoII PE=1 SV=1	Cu ions
PPSFF1-1_S11_R1_001_(paired)_contig_5838	-2.70743	3.65531e-06	-3.78963	1.76517e-08	1.0822	0.292071	201.441	30.7268	11.8976	FL3H_PETCR Flavanone 3-dioxygenase OS=Petroselinum crispum OX=4043 GN=FHT PE=1 SV=1	Flavonoids
PPSMF1-1_S1_R1_001_(paired)_contig_14067	12.8854	1.96915e-05	6.01108	0.111668	6.87428	5.68729e-06	0	44.6572	0.269639	PIN4_BOVIN Peptidyl-prolyl cis-trans isomerase NIMA-interacting 4 OS=Bos taurus OX=9913 GN=PIN4 PE=2 SV=1	..
PPSMF1-1_S1_R1_001_(paired)_contig_2588	4.78242	0	5.27798	6.01255e-14	-0.495561	0.779592	1.19451	32.008	35.8621	SC11C_PONAB Signal peptidase complex catalytic subunit SEC11C OS=Pongo abelii OX=9601 GN=SEC11C PE=2 SV=3
PPSIMF1-1_S3_R1_001_(paired)_contig_17419	5.67979	1.733e-14	6.11742	2.92632e-12	-0.437627	0.8663	0.576327	30.1124	31.6202	LIPC_SOLTU Light-induced chloroplastic OS=Solanum tuberosum OX=4113 PE=1 SV=2
PPSIMF1-1_S3_R1_001_(paired)_contig_12173	8.16533	1.20027e-10	6.05121	0.000172149	2.11412	0.371716	0.140001	37.6526	6.17217	OST1B_ARATH Dolichyl-diphosphooligosaccharide-- glycosyltransferase subunit 1B OS=Arabidopsis thaliana OX=3702 GN=OST1B PE=1 SV=1
PPSIMF1-1_S3_R1_001_(paired)_contig_4391	2.73835	5.79537e-05	2.44705	0.00412982	0.291295	0.915915	4.73235	30.8395	19.4933	HAL3A_ARATH Phosphopantothenoylcysteine decarboxylase OS=Arabidopsis thaliana OX=3702 GN=HAL3A PE=1 SV=1
PPSFF1-1_S11_R1_001_(paired)_contig_39333	11.5967	9.22606e-05	11.0294	0.000294174	0.567354	0.867803	0	31.7472	17.159	CDC25_ARATH Dual specificity phosphatase Cdc25 OS=Arabidopsis thaliana OX=3702 GN=CDC25 PE=1 SV=1
PPSMF1-1_S1_R1_001_(paired)_contig_23075	5.68442	8.97861e-08	5.40682	2.92977e-05	0.277598	0.971623	0.179067	10.2003	6.72745	CDC2_OXYRB Cell division control 2 homolog OS=Oxybasis rubra OX=3560 GN=CDC2 PE=2 SV=1	cell cycle
PPSIMF1-1_S3_R1_001_(paired)_contig_7275	-2.80374	3.21918e-05	-5.07907	1.34615e-11	2.27533	0.00879728	113.201	16.5831	2.82032	ANRPN_VITVI Anthocyanidin reductase ((2S)-flavan-3-ol-forming) OS=Vitis vinifera OX=29760 GN=ANR PE=3 SV=1	Flavonoids
PPSIMF1-1_S3_R1_001_(paired)_contig_7995	7.37101	3.33611e-09	2.9835	0.103299	4.38751	0.00254843	0.0611486	11.2533	0.358194	XTH23_ARATH Probable xyloglucan endotransglucosylase hydrolase 23 OS=Arabidopsis thaliana OX=3702 GN=XTH23 PE=2 SV=1	Cell wall
PPSMF1-1_S1_R1_001_(paired)_contig_16957	5.21736	3.50251e-08	6.25822	1.65957e-08	-1.04087	0.642095	0.550773	20.0967	34.9366	ENL1_ARATH Early nodulin 1 OS=Arabidopsis thaliana OX=3702 GN=At2g25060 PE=1 SV=2	Plasma membrane
PPSFF1-1_S11_R1_001_(paired)_contig_2000	-3.91632	5.88229e-05	-7.84568	2.66573e-13	3.92936	0.000872309	238.922	14.6846	0.871817	E6_GOSHI E6 OS=Gossypium hirsutum OX=3635 GN=E6 PE=2 SV=1	Cell wall
PPSFF1-1_S11_R1_001_(paired)_contig_9546	-4.10505	1.14873e-12	-4.93822	6.31251e-13	0.833161	0.517039	122.448	7.25851	3.43559	STAD6_ARATH Stearoyl-	Lipids
PPSIMF1-1_S3_R1_001_(paired)_contig_593	5.08736	4.83052e-11	2.10521	0.0642518	2.98215	0.00326774	0.719668	24.4613	2.7566	DFRA_MALDO Bifunctional dihydroflavonol 4-reductase flavanone 4-reductase OS=Malus domestica OX=3750 GN=DFR PE=1 SV=1	Flavonoids
PPSFF1-1_S11_R1_001_(paired)_contig_22145	-2.86581	1.88819e-06	-3.83068	4.46861e-08	0.96487	0.405105	60.3368	8.34978	3.60584	SCGT_TOBAC Scopoletin glucosyltransferase OS=Nicotiana tabacum OX=4097 GN=TOGT1 PE=1 SV=1	Sugar/ stress
PPSFF1-1_S11_R1_001_(paired)_contig_9626	-2.96804	5.20972e-06	-5.28717	6.65616e-13	2.31912	0.00626872	58.273	7.64006	1.28428	LAR_DESUN Leucoanthocyanidin reductase OS=Desmodium uncinatum OX=225101 GN=LAR PE=1 SV=1	Flavonoids
PPSFF1-1_S11_R1_001_(paired)_contig_1703	-3.10503	0.00377264	-3.64226	0.00404922	0.537232	0.877379	45.4987	5.82051	3.36296	F3PH_PETHY Flavonoid 3 -monooxygenase OS=Petunia hybrida OX=4102 GN=CYP75B2 PE=2 SV=1	Flavonoids
PPSMF1-1_S1_R1_001_(paired)_contig_4417	-0.457599	0.699246	-2.27887	0.00896981	1.82127	0.0549226	9.69274	7.41367	1.68024	HDG11_ARATH Homeobox-leucine zipper HDG11 OS=Arabidopsis thaliana OX=3702 GN=HDG11 PE=1 SV=1
PPSMF1-1_S1_R1_001_(paired)_contig_17718	3.27193	0.0143357	2.6042	0.133193	0.667732	0.867014	0.370369	3.7858	1.77834	SPL6_ARATH Squamosa promoter-binding 6 OS=Arabidopsis thaliana OX=3702 GN=SPL6 PE=1 SV=2	Pod development
PPSMF1-1_S1_R1_001_(paired)_contig_28347	8.35253	0.0112619	8.34185	0.01312	0.0106724	0.999985	0	5.31978	4.07247	CESA7_ORYSJ Cellulose synthase A catalytic subunit 7	Cell wall
PPSFF1-1_S11_R1_001_(paired)_contig_3947	-2.93838	2.73648e-06	-1.74991	0.041701	-1.18848	0.273454	39.5904	5.12731	10.4254	POT2_ARATH Potassium transporter 2 OS=Arabidopsis thaliana OX=3702 GN=POT2 PE=1 SV=2	Transporter
PPSFF1-1_S11_R1_001_(paired)_contig_901	-3.90709	4.69849e-06	-2.11664	0.0780767	-1.79044	0.19695	40.079	2.7961	7.45822	BGAL1_ARATH Beta-galactosidase 1 OS=Arabidopsis thaliana OX=3702 GN=BGAL1 PE=2 SV=1	Sugar
PPSFF1-1_S11_R1_001_(paired)_contig_11511	-3.35583	0.00872912	-4.17228	0.00520879	0.816449	0.815716	34.119	3.77404	1.79746	ATB51_ARATH homeobox-leucine zipper ATHB-51 OS=Arabidopsis thaliana OX=3702 GN=ATHB-51 PE=2 SV=2
PPSFF1-1_S11_R1_001_(paired)_contig_19068	-5.7586	0	-6.32814	0	0.569544	0.72267	178.572	3.3022	1.83405	GOLS2_ARATH Galactinol synthase 2 OS=Arabidopsis thaliana OX=3702 GN=GOLS2 PE=1 SV=1	Sugar
PPSMF1-1_S1_R1_001_(paired)_contig_19337	7.29093	0.0432681	10.103	0.00332193	-2.81204	0.262954	0	2.46025	11.5923	CESA3_ARATH Cellulose synthase A catalytic subunit 3	Cell wall
PPSFF1-1_S11_R1_001_(paired)_contig_18303	-2.76008	0.00854057	-0.384175	0.880453	-2.37591	0.0887483	24.2761	3.77586	16.8363	ZFP34_ARATH E3 ubiquitin- ligase RZFP34 OS=Arabidopsis thaliana OX=3702 GN=RZPF34 PE=1 SV=1	Ubiquitination
PPSFF1-1_S11_R1_001_(paired)_contig_4698	-3.15677	0.00480595	-0.0633065	0.999897	-3.09346	0.0256268	33.792	3.92104	29.5299	STRAP_DICDI Serine-threonine kinase receptor-associated OS=Dictyostelium discoideum OX=44689 GN=strap PE=3 SV=1	stress/defense
PPSFF1-1_S11_R1_001_(paired)_contig_28037	-2.10959	0.035595	-1.82049	0.15631	-0.289101	0.947175	10.659	2.54264	2.63745	C71DB_LOTJA Cytochrome P450 71D11 (Fragment) OS=Lotus japonicus OX=34305 GN=CYP71D11 PE=2 SV=1
PPSMF1-1_S1_R1_001_(paired)_contig_8938	1.18747	0.422142	3.69546	0.00387302	-2.50798	0.08719	1.46813	3.10102	14.61	MYB2_ORYSJ Transcription factor MYB2 OS=Oryza sativa japonica OX=39947 GN=MYB2 PE=2 SV=1	Flavonoids
PPSFF1-1_S11_R1_001_(paired)_contig_4206	-2.98333	0.00858275	-2.46384	0.0907204	-0.519496	0.890715	16.6211	2.29888	2.73841	IBS1_ARATH IMPAIRED IN BABA-INDUCED STERILITY 1 OS=Arabidopsis thaliana OX=3702 GN=IBS1 PE=3 SV=1	cell cycle
PPSMF1-1_S1_R1_001_(paired)_contig_34357	-3.80886	5.51069e-06	1.98167	0.0945783	-5.79053	1.41554e-10	37.6042	2.65742	108.389	MIF1_ARATH Mini zinc finger 1 OS=Arabidopsis thaliana OX=3702 GN=MIF1 PE=1 SV=1
PPSFF1-1_S11_R1_001_(paired)_contig_18837	-4.2415	2.41603e-10	-5.6921	1.06571e-12	1.4506	0.227484	35.9956	1.95247	0.578824	STP5_ARATH Sugar transport 5 OS=Arabidopsis thaliana OX=3702 GN=STP5 PE=2 SV=1	Sugar
PPSMF1-1_S1_R1_001_(paired)_contig_1195	-1.28078	0.462708	-2.95246	0.0798402	1.67168	0.499114	1.75413	0.718983	0.197099	MY111_ARATH Transcription factor MYB111 OS=Arabidopsis thaliana OX=3702 GN=MYB111 PE=1 SV=1	Flavonoids
PPSFF1-1_S11_R1_001_(paired)_contig_35851	-3.51537	0.00595522	-2.41527	0.158204	-1.1001	0.721452	5.88411	0.535625	0.89542	MYB14_ARATH Transcription factor MYB14 OS=Arabidopsis thaliana OX=3702 GN=MYB14 PE=2 SV=1	Seed coat
PPSMF1-1_S1_R1_001_(paired)_contig_37502	0.281117	0.898228	5.74014	4.26026e-09	-5.45902	5.3024e-09	0.589438	0.706711	25.5051	MYB4_ARATH Transcription repressor MYB4 OS=Arabidopsis thaliana OX=3702 GN=MYB4 PE=1 SV=1	Lignin
PPSFF1-1_S11_R1_001_(paired)_contig_52	-7.25917	0	-13.8543	9.07383e-05	6.59515	0.179259	85.3529	0.558874	0	EXPA2_ORYSJ Expansin-A2 OS=Oryza sativa japonica OX=39947 GN=EXPA2 PE=2 SV=2
PPSMF1-1_S1_R1_001_(paired)_contig_529	-6.09261	2.72367e-08	-2.27347	0.175498	-3.81913	0.00906354	21.4875	0.32526	4.13881	BASS2_ARATH Sodium pyruvate cotransporter chloroplastic OS=Arabidopsis thaliana OX=3702 GN=BASS2 PE=1 SV=1
PPSFF1-1_S11_R1_001_(paired)_contig_3187	-7.42924	0	-1.72917	0.184297	-5.70007	3.32822e-09	46.287	0.276755	9.32195	OST48_ARATH Dolichyl-diphosphooligosaccharide-- glycosyltransferase 48 kDa subunit OS=Arabidopsis thaliana OX=3702 GN=OST48 PE=2 SV=1	.
PPSMF1-1_S1_R1_001_(paired)_contig_12561	-4.70961	0.000889059	-7.1781	0.000267081	2.46848	0.449452	5.78268	0.236763	0.0303758	MYB12_ARATH Transcription factor MYB12 OS=Arabidopsis thaliana OX=3702 GN=MYB12 PE=1 SV=1	Flavonoids
PPSFF1-1_S11_R1_001_(paired)_contig_2982	-7.24019	2.02518e-09	-3.60808	0.0296804	-3.63211	0.0360057	20.4442	0.148266	1.56143	MSI4_ARATH WD-40 repeat-containing MSI4 OS=Arabidopsis thaliana OX=3702 GN=MSI4 PE=1 SV=3
PPSFF1-1_S11_R1_001_(paired)_contig_11	-8.30075	0	-1.1473	0.557231	-7.15345	1.38075e-09	79.5797	0.253705	33.4539	AL7A1_MALDO Aldehyde dehydrogenase family 7 member A1 OS=Malus domestica OX=3750 PE=1 SV=3
PPSFF1-1_S11_R1_001_(paired)_contig_6966	-8.21271	0	-8.77968	1.77315e-09	0.566971	0.924554	14.0175	0.0493303	0.0247571	D6KL2_ARATH Serine threonine- kinase D6PKL2 OS=Arabidopsis thaliana OX=3702 GN=D6PKL2 PE=1 SV=1
PPSFF1-1_S11_R1_001_(paired)_contig_23857	-5.11119	0.000328288	1.23154	0.620989	-6.34274	6.31814e-05	8.1096	0.235404	17.8517	ERLI1_ARATH Lipid transfer EARLI 1 OS=Arabidopsis thaliana OX=3702 GN=EARLI1 PE=1 SV=1	lipids
PPSFF1-1_S11_R1_001_(paired)_contig_415	-8.94754	0	-0.961974	0.561997	-7.98557	0	48.8056	0.0992548	23.3055	PRS7_PRUPE 26S proteasome regulatory subunit 7 OS=Prunus persica OX=3760 GN=RPT1 PE=2 SV=1	Ubiquitination
PPSFF1-1_S11_R1_001_(paired)_contig_5805	-9.6956	0	0.337508	0.909431	-10.0331	0	59.7058	0.0768123	50.2325	RAE1A_ARATH Ras-related RABE1a OS=Arabidopsis thaliana OX=3702 GN=RABE1A PE=1 SV=1
PPSMF1-1_S1_R1_001_(paired)_contig_2338	-12.3315	0	-6.37427	3.36548e-08	-5.95728	2.03424e-06	352.42	0.0707932	4.11466	FENR3_ORYSJ Ferredoxin--NADP embryo chloroplastic OS=Oryza sativa japonica OX=39947 GN=Os07g0147900 PE=1 SV=1	.
PPSFF1-1_S11_R1_001_(paired)_contig_8321	-7.2091	1.04844e-09	-6.71137	7.54117e-06	-0.497727	0.935673	6.44919	0.0420184	0.0392664	TDX_ARATH TPR repeat-containing thioredoxin TDX OS=Arabidopsis thaliana OX=3702 GN=TDX PE=1 SV=1	Plasma membrane
PPSFF1-1_S11_R1_001_(paired)_contig_2586	-10.241	0	-9.88915	2.35064e-12	-0.351893	0.978067	41.724	0.0327291	0.0361871	PPO_MALDO Polyphenol chloroplastic OS=Malus domestica OX=3750 PE=2 SV=1	polyphenol
PPSMF1-1_S1_R1_001_(paired)_contig_43588	-9.45343	6.43002e-07	0.263723	0.974015	-9.71715	2.2614e-06	24.7937	0.0241722	27.8125	PME44_ARATH Probable pectinesterase pectinesterase inhibitor 44 OS=Arabidopsis thaliana OX=3702 GN=PME44 PE=2 SV=2	cell wall
PPSFF1-1_S11_R1_001_(paired)_contig_873	-11.231	0	-7.39955	0	-3.83149	0.00150253	39.7265	0.015464	0.213023	BAMS_BETPL Beta-amyrin synthase OS=Betula platyphylla OX=78630 GN=OSCBPY PE=1 SV=1	terpenoids
PPSFF1-1_S11_R1_001_(paired)_contig_1398	-11.214	2.80509e-13	-10.1245	9.35027e-09	-1.08949	0.876882	42.0098	0.013579	0.0279176	C77A3_SOYBN Cytochrome P450 77A3 OS=Glycine max OX=3847 GN=CYP77A3 PE=2 SV=1
PPSMF1-1_S1_R1_001_(paired)_contig_19823	-10.1368	2.52049e-08	-0.863355	0.745579	-9.27344	3.8519e-06	33.9628	0.0203365	17.221	REMO_SOLTU Remorin OS=Solanum tuberosum OX=4113 PE=1 SV=1	plasma membrane/lipids
PPSIMF1-1_S3_R1_001_(paired)_contig_10821	2.5521	0.00522243	2.38043	0.0356116	0.171673	0.987872	1.89058	10.8737	8.63534	4CL1_TOBAC 4-coumarate-- ligase 1 OS=Nicotiana tabacum OX=4097 GN=4CL1 PE=2 SV=1
PPSMF1-1_S1_R1_001_(paired)_contig_38100	5.8418	2.56075e-12	7.1433	1.7379e-13	-1.3015	0.424039	0.184332	10.1658	19.7501	STP14_ARATH Sugar transport 14 OS=Arabidopsis thaliana OX=3702 GN=STP14 PE=2 SV=2	transporter
PPSMF1-1_S1_R1_001_(paired)_contig_476	2.14837	0.0157695	10.2748	0	-8.12647	0	0.324949	1.42241	316.748	STP10_ARATH Sugar transport 10 OS=Arabidopsis thaliana OX=3702 GN=STP10 PE=2 SV=1	transporter
PPSMF1-1_S1_R1_001_(paired)_contig_15316	-0.902354	0.298313	2.59282	0.000916263	-3.49518	7.03053e-07	49.1272	25.9644	220.087	YSL5_ARATH Probable metal-nicotianamine transporter YSL5 OS=Arabidopsis thaliana OX=3702 GN=YSL5 PE=1 SV=1	transporter
PPSMF1-1_S1_R1_001_(paired)_contig_10800	-0.585774	0.532921	3.26351	3.65163e-06	-3.84928	3.84927e-09	21.994	14.9669	157.6	ACA9_ARATH Calcium-transporting ATPase plasma membrane-type OS=Arabidopsis thaliana OX=3702 GN=ACA9 PE=2 SV=2
PPSIMF1-1_S3_R1_001_(paired)_contig_21106	9.60554	0	8.67981	0	0.92573	0.545929	0.0481461	39.0124	15.5642	ZIP11_ARATH Zinc transporter 11 OS=Arabidopsis thaliana OX=3702 GN=ZIP11 PE=2 SV=1	transporter
PPSMF1-1_S1_R1_001_(paired)_contig_16784	5.23435	4.69705e-13	5.3255	8.25046e-10	-0.0911486	0.999985	0.469049	17.125	14.645	PHO1_ARATH Phosphate transporter PHO1 OS=Arabidopsis thaliana OX=3702 GN=PHO1 PE=1 SV=1	transporter
PPSFF1-1_S11_R1_001_(paired)_contig_2679	-2.71062	0.00820377	-0.243182	0.947003	-2.46744	0.0629816	24.8948	3.54841	14.3019	AB2E_ARATH ABC transporter E family member 2 OS=Arabidopsis thaliana OX=3702 GN=ABCE2 PE=2 SV=1	transporter
PPSIMF1-1_S3_R1_001_(paired)_contig_26612	3.20941	4.83061e-08	3.09425	1.81866e-05	0.11516	0.992844	1.9575	18.1394	13.1016	POT2_ARATH Potassium transporter 2 OS=Arabidopsis thaliana OX=3702 GN=POT2 PE=1 SV=2	transporter
PPSMF1-1_S1_R1_001_(paired)_contig_4265	8.18174	2.4799e-10	8.85701	5.94015e-10	-0.675268	0.830054	0.0299793	10.2464	11.9857	ZTP29_ARATH Zinc transporter ZTP29 OS=Arabidopsis thaliana OX=3702 GN=ZTP29 PE=2 SV=1	transporter
PPSMF1-1_S1_R1_001_(paired)_contig_20843	5.68848	0.131814	11.8629	0.000182077	-6.17447	4.43544e-05	0	0.185676	11.7815	COPT5_ARATH Copper transporter 5 OS=Arabidopsis thaliana OX=3702 GN=COPT5 PE=1 SV=1	transporter
PPSFF1-1_S11_R1_001_(paired)_contig_7643	-1.29752	0.133172	-2.4464	0.0060151	1.14888	0.368944	6.72056	2.80715	1.0606	AB1A_ARATH ABC transporter A family member 1 OS=Arabidopsis thaliana OX=3702 GN=ABCA1 PE=2 SV=2	transporter
PPSFF1-1_S11_R1_001_(paired)_contig_4856	-2.19265	0.0587789	-4.74809	7.51165e-05	2.55544	0.0770466	6.39787	1.49088	0.168934	AB10C_ARATH ABC transporter C family member 10 OS=Arabidopsis thaliana OX=3702 GN=ABCC10 PE=2 SV=2	transporter
PPSFF1-1_S11_R1_001_(paired)_contig_6052	-1.35228	0.337061	-3.12623	0.0205516	1.77394	0.333245	5.48068	2.13685	0.492753	ANTA_GENTR Anthocyanin 5-aromatic acyltransferase OS=Gentiana triflora OX=55190 PE=1 SV=1	Flavonoids
PPSFF1-1_S11_R1_001_(paired)_contig_17590	-2.96251	0.00635369	-5.64757	2.54266e-06	2.68506	0.0701871	10.7948	1.42855	0.201053	CCX1_ARATH Cation calcium exchanger 1 OS=Arabidopsis thaliana OX=3702 GN=CCX1 PE=2 SV=1
PPSIMF1-1_S3_R1_001_(paired)_contig_13700	-2.06318	0.0372357	-4.40244	2.46675e-05	2.33926	0.0617433	9.11521	2.15305	0.33415	FMO1_ARATH Probable flavin-containing monooxygenase 1 OS=Arabidopsis thaliana OX=3702 GN=FMO1 PE=2 SV=1	Flavonoids
PPSFF1-1_S11_R1_001_(paired)_contig_6395	-3.16534	9.15381e-06	-2.85007	0.00144593	-0.315261	0.915082	21.9266	2.32015	2.47135	HGL2_ARATH Homeobox-leucine zipper GLABRA 2 OS=Arabidopsis thaliana OX=3702 GN=GL2 PE=2 SV=3
PPSFF1-1_S11_R1_001_(paired)_contig_6819	-2.08263	0.0129249	-3.11344	0.000894852	1.03081	0.507068	12.1752	2.96949	1.19805	HMA6_ARATH Copper-transporting ATPase chloroplastic OS=Arabidopsis thaliana OX=3702 GN=PAA1 PE=1 SV=1
PPSFF1-1_S11_R1_001_(paired)_contig_19527	-6.98708	7.1534e-10	-5.09586	0.000276171	-1.89122	0.416446	7.96138	0.0621815	0.214213	MYBC_MAIZE Anthocyanin regulatory C1 OS=Zea mays OX=4577 GN=C1 PE=2 SV=1	Flavonoids
PPSIMF1-1_S3_R1_001_(paired)_contig_40	-0.419057	0.705648	-2.47803	0.00157381	2.05898	0.0112534	30.9044	23.1903	4.66864	WAT1_ARATH WALLS ARE THIN 1 OS=Arabidopsis thaliana OX=3702 GN=WAT1 PE=1 SV=1
PPSIMF1-1_S3_R1_001_(paired)_contig_15100	-1.61966	0.436959	-12.1145	0.00237764	10.4949	0.0153426	19.257	6.99628	0	FAOMT_VITVI Flavonoid 3 ,5 -methyltransferase OS=Vitis vinifera OX=29760 GN=FAOMT PE=1 SV=1	Flavonoids
PPSMF1-1_S1_R1_001_(paired)_contig_15708	10.6143	0.000392064	13.2771	4.22041e-06	-2.66274	0.0363899	0	3.43524	15.6413	SAP11_ARATH Zinc finger AN1 and C2H2 domain-containing stress-associated 11 OS=Arabidopsis thaliana OX=3702 GN=SAP11 PE=2 SV=1
PPSMF1-1_S1_R1_001_(paired)_contig_44627	0.524365	0.69725	9.19768	0	-8.67331	0	0.292513	0.423976	122.468	CO3_ORYSJ Zinc finger CO3 OS=Oryza sativa japonica OX=39947 GN=CO3 PE=2 SV=1
PPSMF1-1_S1_R1_001_(paired)_contig_17855	-1.8402	0.735826	11.1109	5.11155e-10	-12.9511	9.47148e-07	0.00419222	0	9.2603	C3H7_ARATH Zinc finger CCCH domain-containing 7 OS=Arabidopsis thaliana OX=3702 GN=At1g21570 PE=1 SV=1
PPSMF1-1_S1_R1_001_(paired)_contig_6455	-0.448041	0.785922	4.28868	1.28805e-05	-4.73672	3.0421e-07	1.11115	0.833019	16.5273	C3H18_ORYSJ Zinc finger CCCH domain-containing 18 OS=Oryza sativa japonica OX=39947 GN=Os02g0793000 PE=2 SV=1
PPSMF1-1_S1_R1_001_(paired)_contig_34045	0.816894	0.572174	4.02964	0.000257167	-3.21275	0.00466824	0.996375	1.72525	12.8145	C2GR2_ARATH C2 and GRAM domain-containing At5g50170 OS=Arabidopsis thaliana OX=3702 GN=At5g50170 PE=2 SV=1
